# Supplementary material for: Identification of Immunological Parameters as Predictive Biomarkers of Relapse in Patients with Chronic Myeloid Leukemia on Treatment-Free Remission
Source: J Clin Med. 2020 Dec 25;10(1):42. doi: 10.3390/jcm10010042 (PMC7795332; doi:10.3390/jcm10010042)
Supplement: Supplementary file 1 [file jcm-10-00042-s001.pdf]

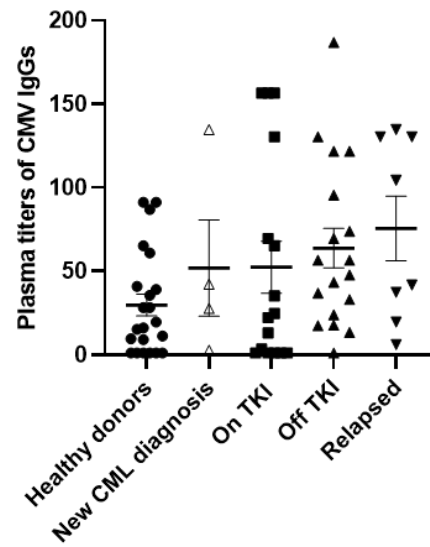

**Figure S1.** Titers of IgGs against CMV in plasma from the different groups of patients with CML. Plasma samples were analyzed by ELISA to detect specific IgG against CMV using Enzygnost Anti-CMV/IgG kit (Siemens, Marburg, Germany). This test was a single point quantitative assay based in the alpha-method [1], using dilutions 1:231. IgG titer was considered positive when >500; undetermined range was considered between 500 and 231; and <231 was considered negative. All data were normalized according to 231 value as basal. Statistical analysis was performed using one-way ANOVA and Tukey's multiple comparisons test but no significant differences between groups were found. [1] Dopatka HD, Giesendorf B. Single point quantification of antibody by ELISA without need of a reference curve. J Clin Lab Anal 1992, 6:417-422. doi:10.1002/jcla.1860060614.

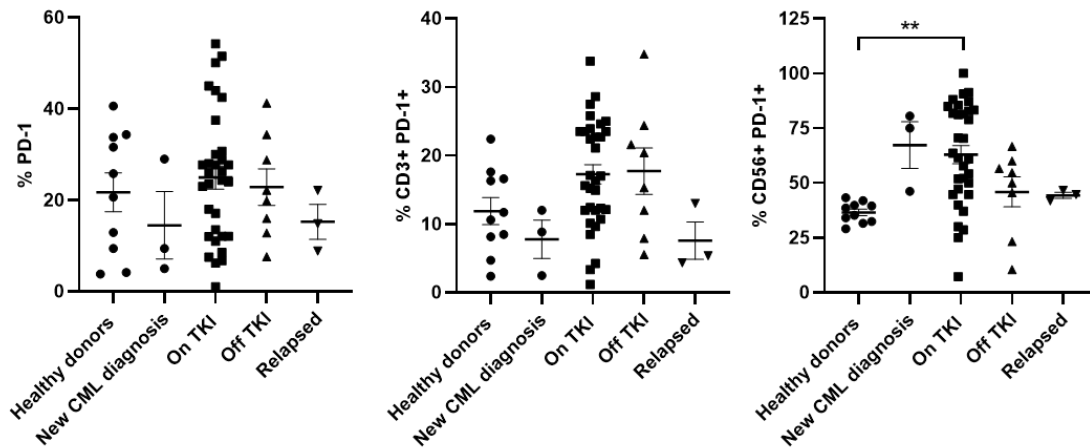

**Figure S2.** Changes in the expression of PD1 in mononuclear cells from peripheral blood of patients with CML. Levels of total PD1 (a), in CD3+ cells (b) and in CD56+ cells (c) were analyzed by flow cytometry after staining with the corresponding antibodies. PD1-BV650 antibody was purchased from BD Biosciences. Statistical analysis was performed using one-way ANOVA and Tukey's multiple comparisons test. \*\*,  $p < 0.01$ .
